# Supplementary material for: Different transition metal (Fe2+, Co2+, Ni2+, Cu2+ or VO2+) Schiff complexes immobilized onto three-dimensional mesoporous silica KIT-6 for the epoxidation of styrene
Source: Royal Society of Chemistry journal article supplement (doi:10.1039/c3ra45599h), 2013-12-06
Supplement: c3ra45599h.pdf [file c3ra45599h.pdf]

## Supporting Information

### Different transition metal ( $\text{Fe}^{2+}$ , $\text{Co}^{2+}$ , $\text{Ni}^{2+}$ , $\text{Cu}^{2+}$ or $\text{VO}^{2+}$ ) Schiff complexes immobilized onto three-dimensional mesoporous silica KIT-6 for the epoxidation of styrene

Jian Sun<sup>a</sup>, Qiubin Kan<sup>a</sup>, Zhifang Li<sup>a</sup>, Guangli Yu<sup>b</sup>, Heng Liu<sup>a</sup>, Xiaoyuan Yang<sup>a</sup>, Qisheng Huo<sup>b</sup>, Jingqi Guan<sup>\*a</sup>

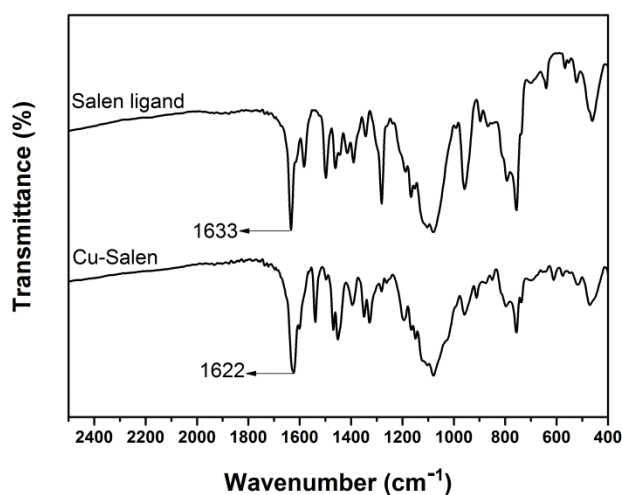

**Fig. S1** FT-IR spectra of Salen ligand and Cu-Salen.

IR (KBr pellets,  $\text{cm}^{-1}$ ): 1633  $\nu(\text{C}=\text{N})$ , 1281  $\nu(\text{C}=\text{O})$ , 1583-1342  $\nu(\text{C}=\text{C})$ , 1080  $\nu(\text{Si}-\text{O})$  for Salen ligand

IR (KBr pellets,  $\text{cm}^{-1}$ ): 1622  $\nu(\text{C}=\text{N})$ , 1193  $\nu(\text{C}=\text{O})$ , 1537-1280  $\nu(\text{C}=\text{C})$  for Cu-Salen
